# Supplementary material for: Geothermal heating affecting ocean stratification and circulation after the Last Glacial Maximum
Source: Research Square preprint supplement (doi:10.21203/rs.3.rs-5502115/v1), 2024-11-26
Supplement: Supplementary file 1 [file a4cbe83c7e3bb8c4d8e19e74.pdf]

**Supplementary Information for**  
**Geothermal heating affecting ocean stratification and circulation**  
**after the Last Glacial Maximum**

Ming Zhang<sup>1</sup>, Qi Cui<sup>2</sup>, Yonggang Liu<sup>2,3\*</sup>, Jiang Zhu<sup>4</sup>, Zhuoqun Wang<sup>2</sup>, Gerrit Lohmann<sup>5,6\*</sup>

<sup>1</sup>National Supercomputing Center in Shenzhen, Shenzhen, China

*<sup>2</sup>Laboratory for Climate and Ocean-Atmosphere Studies, Department of Atmospheric and Oceanic Sciences, School of Physics, Peking University, Beijing, 100871, China*

<sup>3</sup>*Institute of Ocean Research, Peking University, Beijing, 100871, China*

*<sup>4</sup>Climate and Global Dynamics Laboratory, National Center for Atmospheric Research, Boulder, CO, USA*

*<sup>5</sup>Alfred Wegener Institute, Helmholtz Centre for Polar and Marine Research,  
Bremerhaven, Germany*

<sup>6</sup>*University of Bremen, Bremen, Germany*

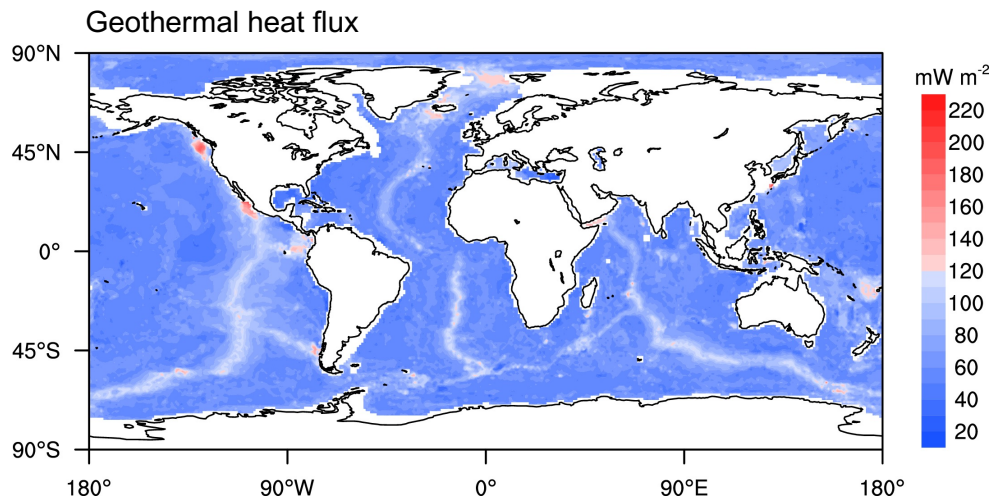

**Figure. S1.** Distribution of the geothermal heat fluxes at the sea floor (units: mW m<sup>-2</sup>) from Goutorbe et al. (2011).

49 **Table. S1.** Summary of the experiment parameters and results.

| Experiment                                                           | LGMCtl | LGMGHFd     | LGMGHFg               | LGMGHFd_in  |
|----------------------------------------------------------------------|--------|-------------|-----------------------|-------------|
| Orbit                                                                | 21 ka  | 21 ka       | 21 ka                 | 21 ka       |
| CO <sub>2</sub> (ppm)                                                | 185    | 185         | 185                   | 185         |
| CH <sub>4</sub> (ppb)                                                | 350    | 350         | 350                   | 350         |
| N <sub>2</sub> O (ppb)                                               | 200    | 200         | 200                   | 200         |
| Ice sheets                                                           | ICE-6G | ICE-6G      | ICE-6G                | ICE-6G      |
| Topography coastlines                                                | ICE-6G | ICE-6G      | ICE-6G                | ICE-6G      |
| Geothermal heating                                                   | none   | Davies 2013 | Goutorbe et al., 2011 | Davies 2013 |
| Duration (year)                                                      | 4000   | 4000        | 2200                  | 1000        |
| GMST (°C)                                                            | 7.66   | 8.15        | 7.89                  | -           |
| AMOC strength (Sv)*                                                  | 24.79  | 24.19       | 24.72                 | -           |
| AMOC depth (m)*                                                      | 2866   | 2991        | 2919                  | -           |
| AABW strength (Sv)*                                                  | -9.48  | -10.32      | -9.85                 | -           |
| GMST trend (°C/kyr)*                                                 | 0.06   | 0.11        | 0.13                  | -           |
| AMOC trend (Sv/kyr)*                                                 | -0.18  | -0.26       | -0.33                 | -           |
| Atlantic stratification<br>( $N^2$ , $10^{-6} \text{ s}^{-2}$ )*     | 6.09   | 5.90        | 6.00                  | -           |
| Pacific stratification<br>( $N^2$ , $10^{-6} \text{ s}^{-2}$ )*      | 9.50   | 9.42        | 9.41                  | -           |
| Global ocean stratification<br>( $N^2$ , $10^{-6} \text{ s}^{-2}$ )* | 7.12   | 7.00        | 7.03                  | -           |

50 \* The AMOC strength is defined as the maximum Atlantic meridional streamfunction (AMSF) below  
51 500 m depth. The AMOC depth is diagnosed as the depth of zero streamfunction between 1000 and  
52 3500 m in the Atlantic. The AABW strength is defined as the minimum globally meridional  
53 streamfunction (GMSF) below 3000 m depth. The GMST and AMOC trend are calculated based on the  
54 last 1000 years of simulations. The stratification is represented by the Brunt-Vaisala frequency ( $N^2$ ,  
55  $N^2(z) = -\frac{g}{\rho_0} \frac{d\rho(z)}{dz}$ ).  $N^2 > 0$ , as density increases with depth.

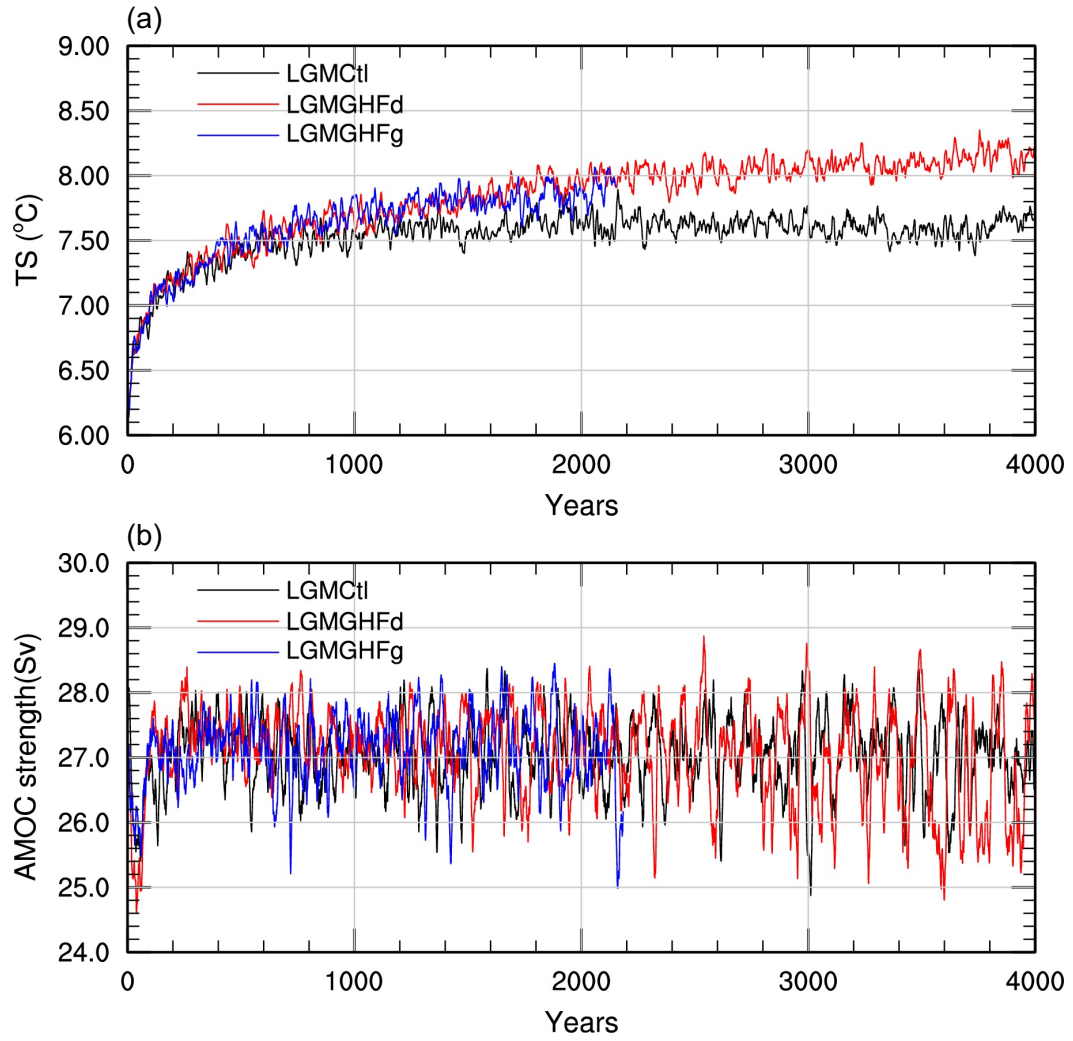

**Figure. S2.** Evolution of (a) globally annual mean surface temperature (unit: °C) and (b) AMOC strength (defined as the maximum Atlantic meridional streamfunction below 500 m depth, unit: Sv) in the experiments of LGMCtl, LGMGHFd and LGMGHFg. A 10-yr running mean filter has been applied to all curves.



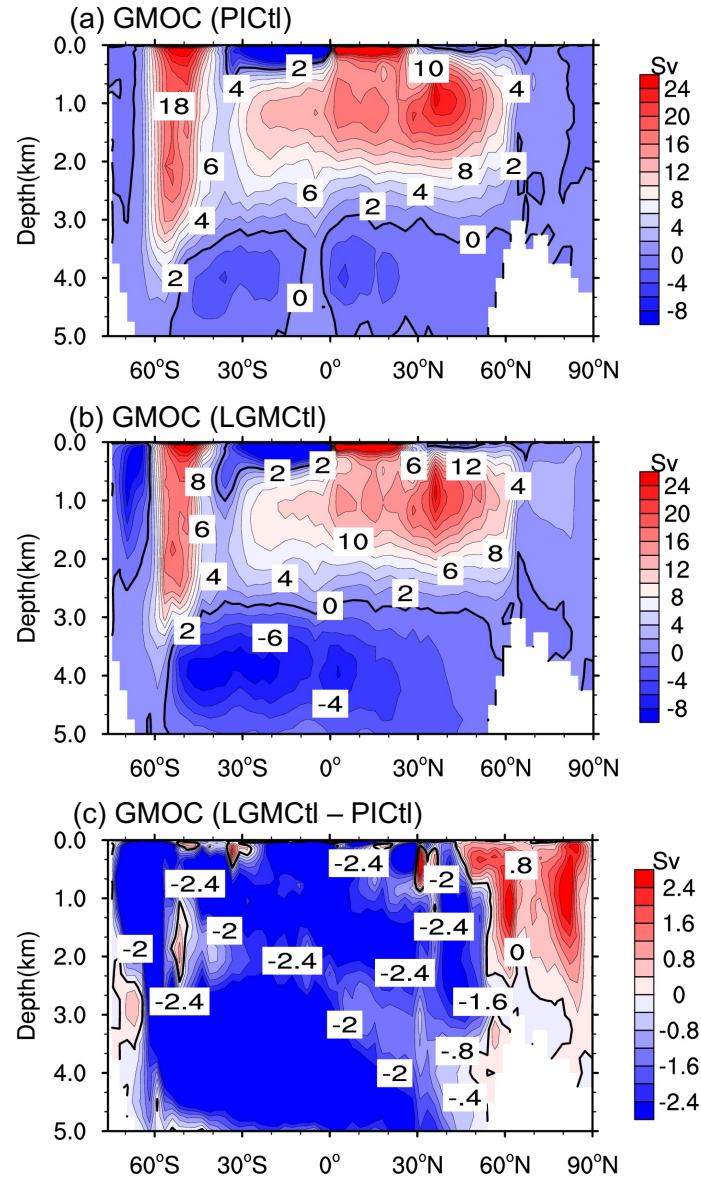

**Figure S3.** Global meridional ocean circulation (GMOC, units: Sv) for PI and LGM is shown in (a) and (b), respectively. GMOC difference between LGM and PI is shown in (c). Zero contour lines are indicated in black.

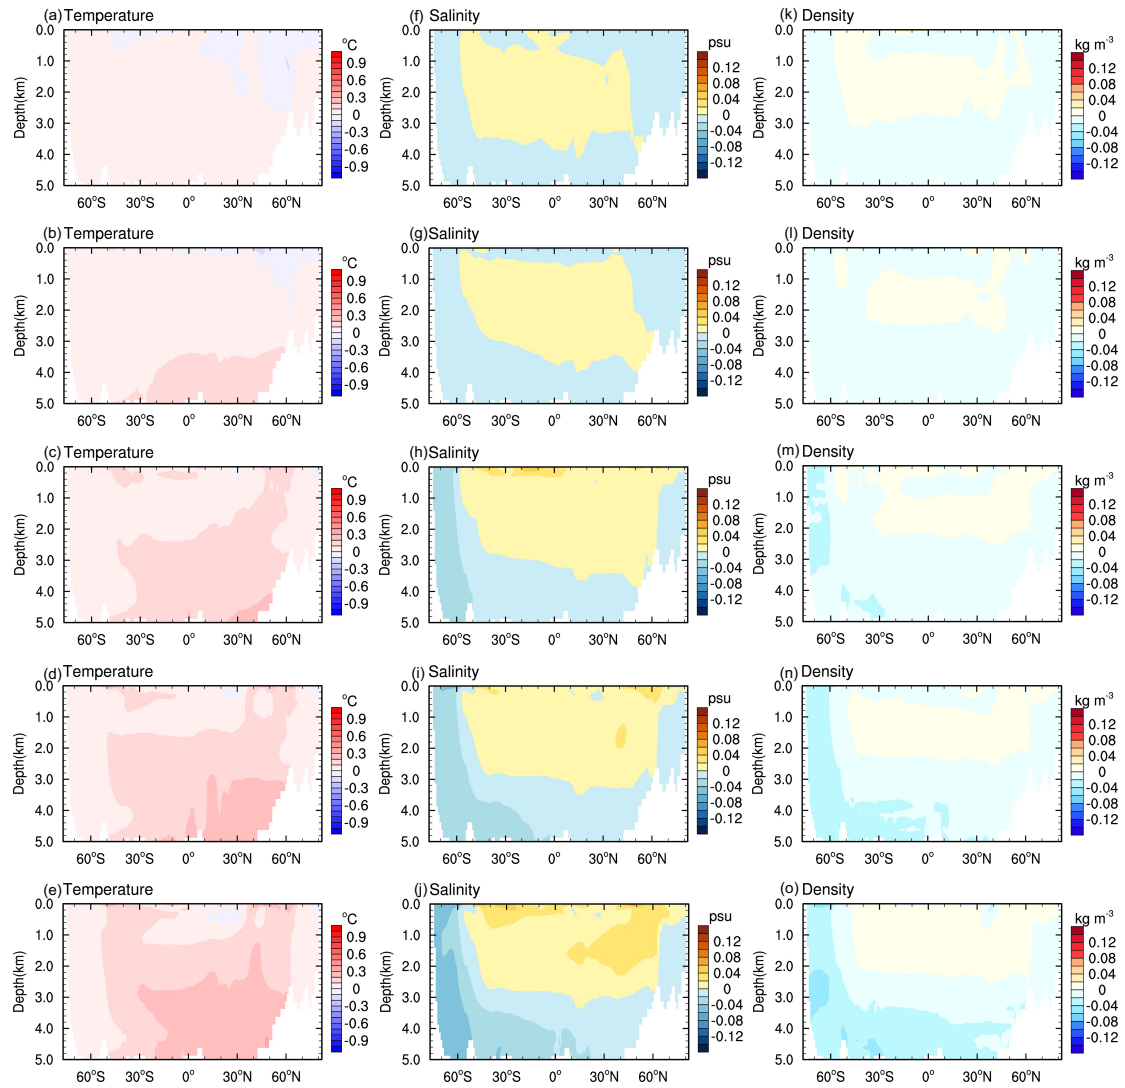

**Figure S4.** Changes of zonal-mean (a-e) potential temperature (units: °C), (f-j) salinity (units: psu) and (k-o) potential density (units: kg m<sup>-3</sup>) in the Atlantic Ocean averaged over (a, f, k) year 1-200; (b, g, l) year 201-400; (c, h, m) year 401-600; (d, i, n) year 601-800; (e, j, o) year 801-1000 after adding the geothermal heat flux. Part of the Southern Ocean over 70°W-20°E is included.

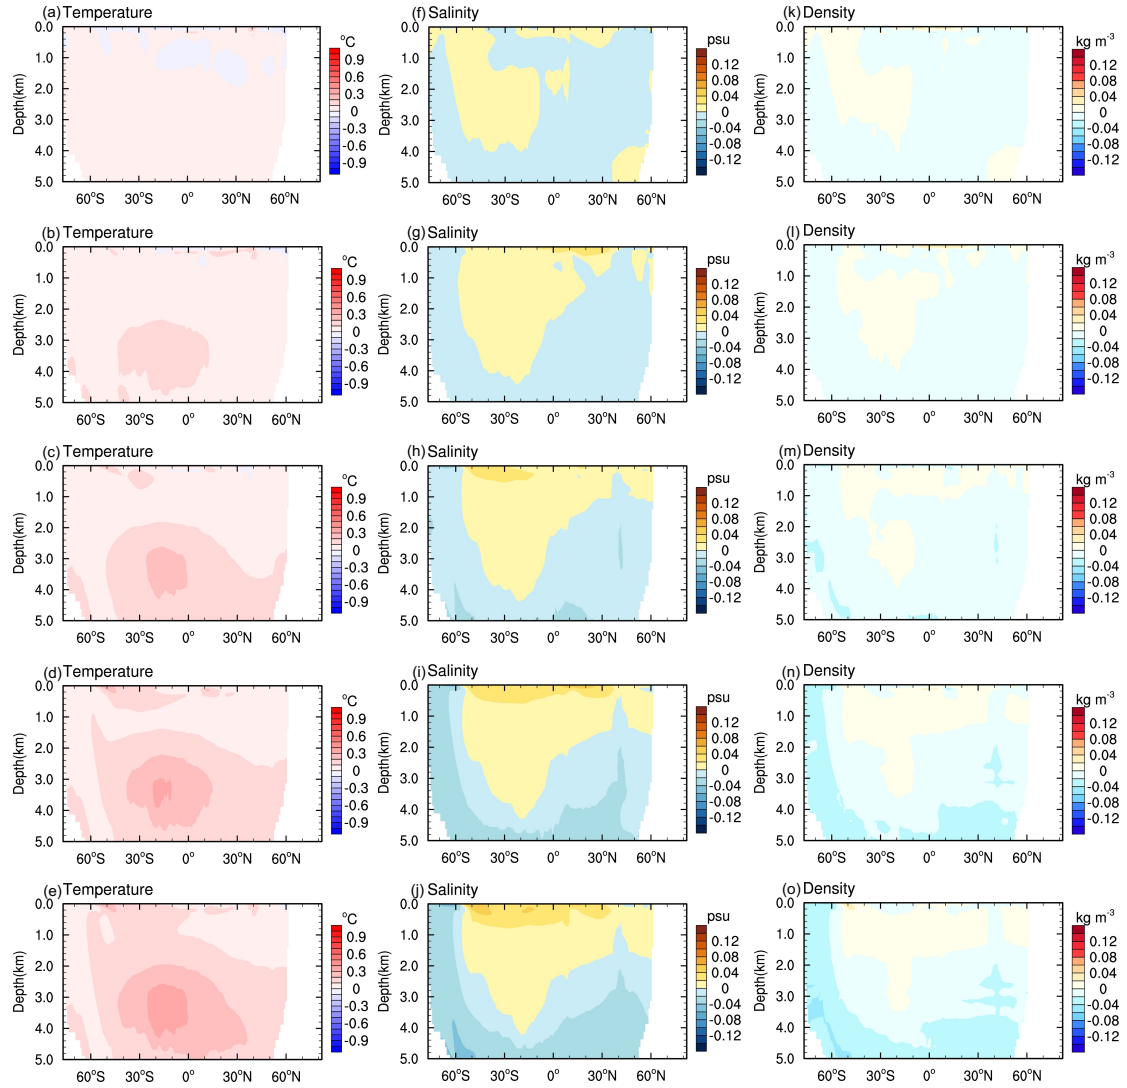

**Figure. S5.** Changes of zonal-mean (a-e) potential temperature (units: °C), (f-j) salinity (units: psu) and (k-o) potential density (units: kg m<sup>-3</sup>) in the Pacific Ocean averaged over (a, f, k) year 1-200; (b, g, i) year 201-400; (c, h, m) year 401-600; (d, i, n) year 601-800; (e, j, o) year 801-1000 after adding the geothermal heating. Part of the Southern Ocean over 130°E-180° and 180°-70°W is included.

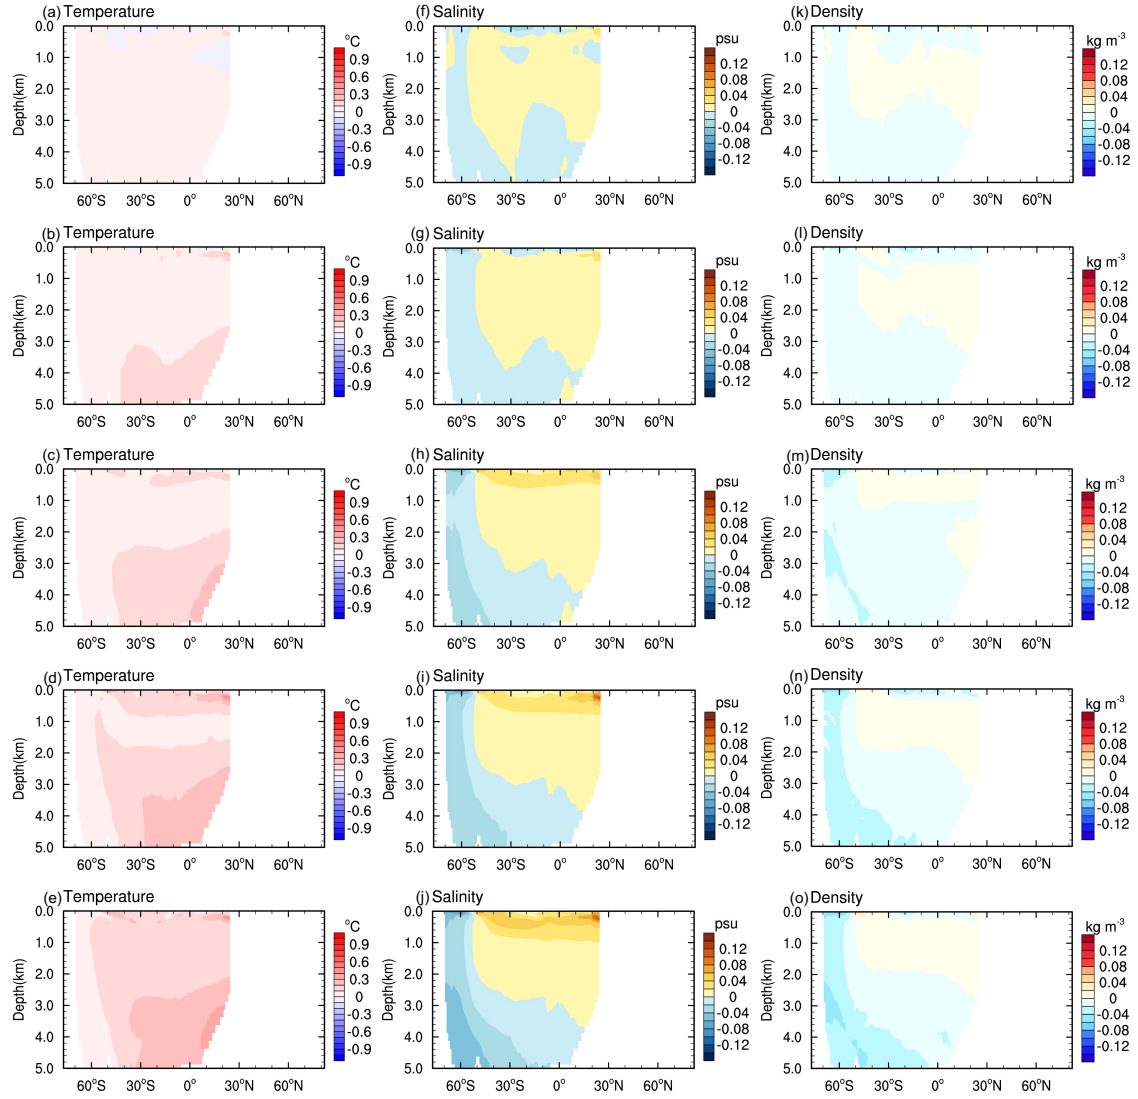

**Figure. S6.** Changes of zonal-mean (a-e) potential temperature (units: °C), (f-j) salinity (units: psu) and (k-o) potential density (units:  $\text{kg m}^{-3}$ ) in the Indian Ocean averaged over (a, f, k) year 1-200; (b, g, l) year 201-400; (c, h, m) year 401-600; (d, i, n) year 601-800; (e, j, o) year 801-1000 after adding the geothermal heating. Part of the Southern Ocean between 20 °E and 130 °E is included.

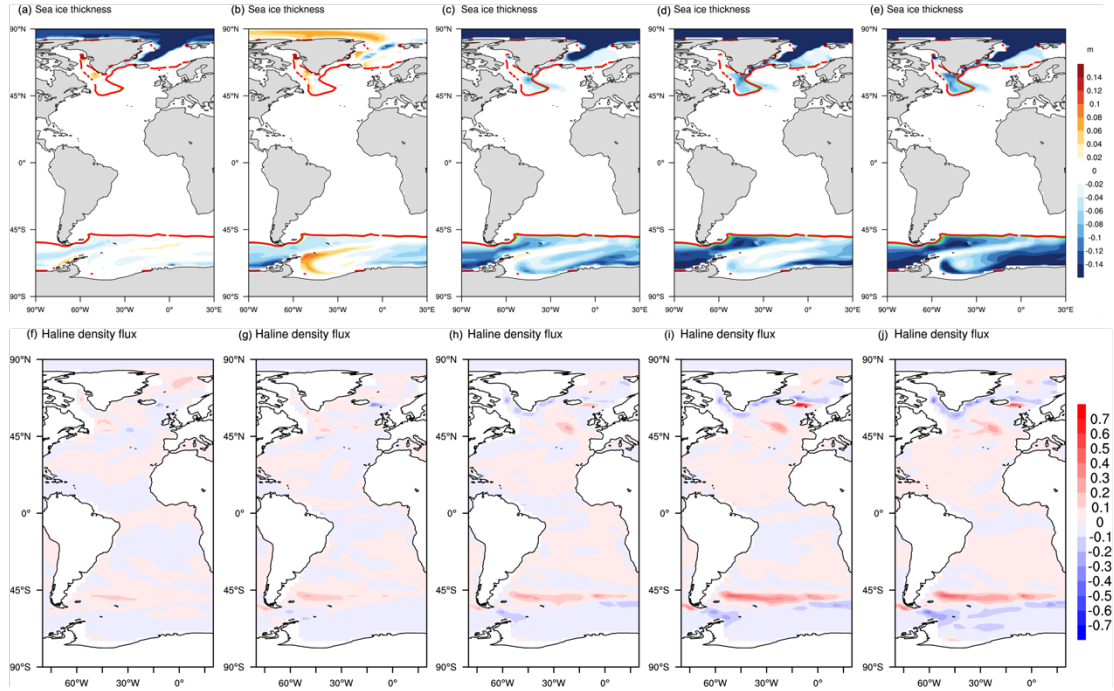

**Figure. S7.** Changes in annual mean (a-e) sea ice thickness (in color, units: m) and (f-j) haline density flux (units:  $10^{-6} \text{ kg m}^{-2} \text{ s}^{-1}$ ) averaged over (a, f) year 1-200; (b, g) year 201-400; (c, h) year 401-600; (d, i) year 601-800; (e, j) year 801-1000 after adding the geothermal heat flux. The sea-ice margin (defined as the 15 % sea ice-fraction) in the Atlantic Ocean in both LGMCTl and LGMGHFd are shown in red and green contours (a-e), respectively.

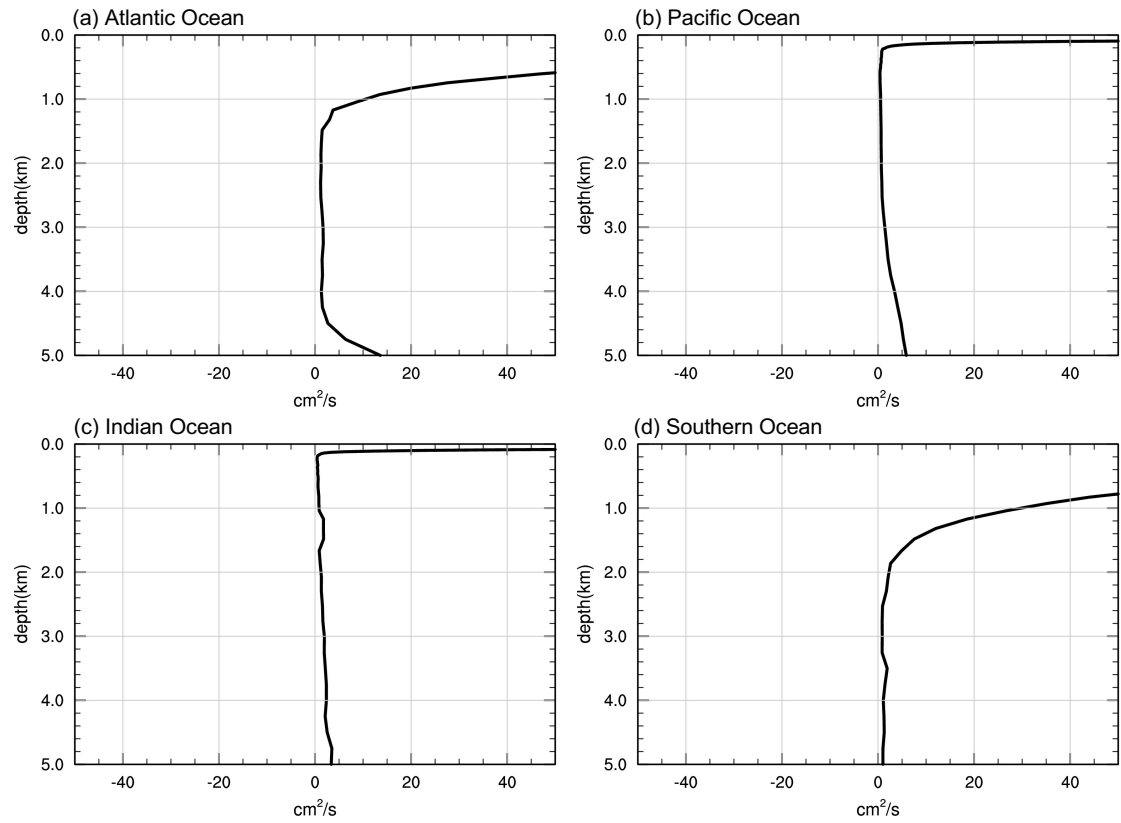

**Figure. S8.** Annual-mean vertical diffusivity coefficient (units:  $\text{cm}^2/\text{s}$ ) in the (a) Atlantic Ocean, (b) Pacific Ocean, (c) Indian Ocean and (d) Southern Ocean in the control experiment (LGMctl).

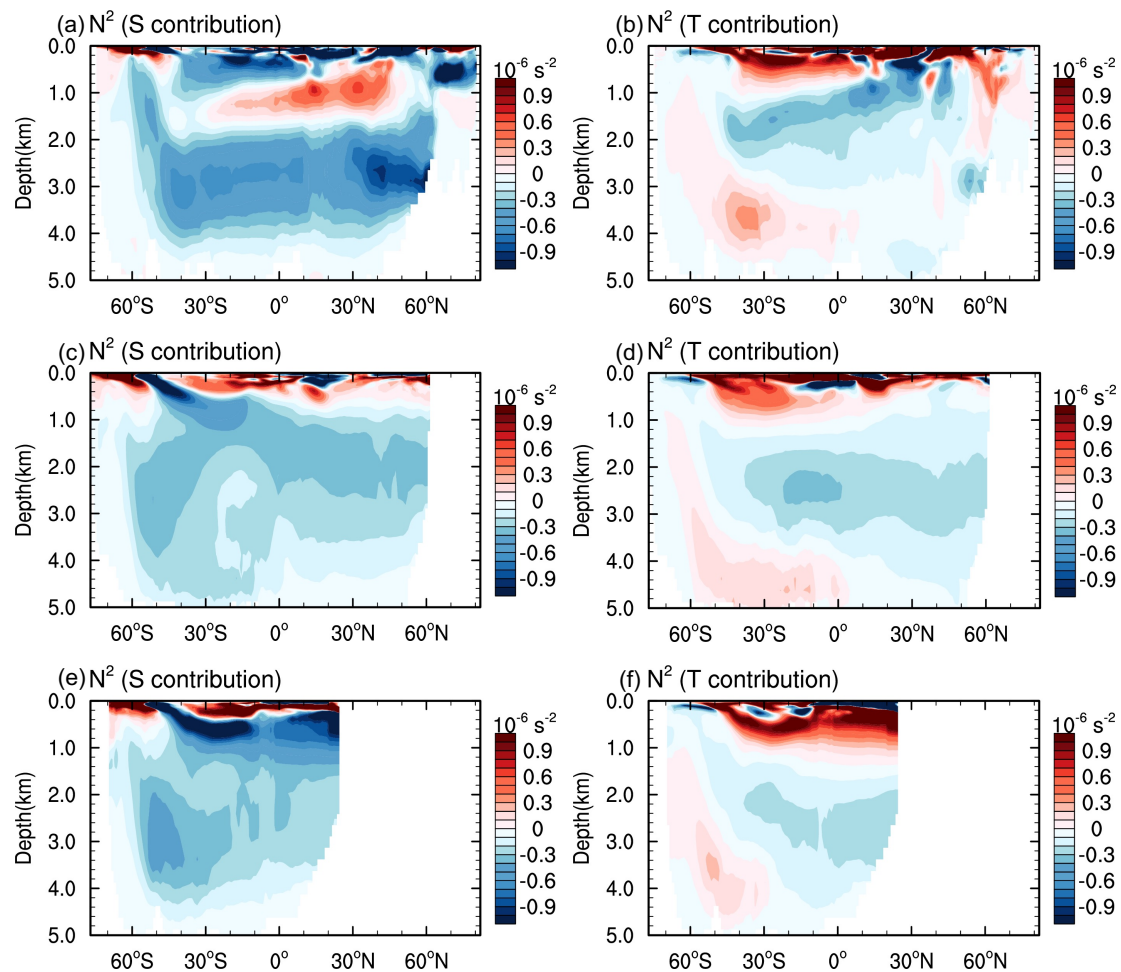

**Figure. S9.** Changes in zonal mean Brunt-Vaisala frequency ( $N^2$ , units:  $10^{-6} \text{ s}^{-2}$ ) contributed by salinity (a, c, e) and temperature (b, d, f) in the Atlantic Ocean (a-b), Pacific Ocean (c-d) and Indian Ocean (e-f) for the experiment LGMGHFd compared to LGMctl. Part of the Southern Ocean within the longitude range of the Atlantic Ocean, Pacific Ocean and Indian Ocean is included.



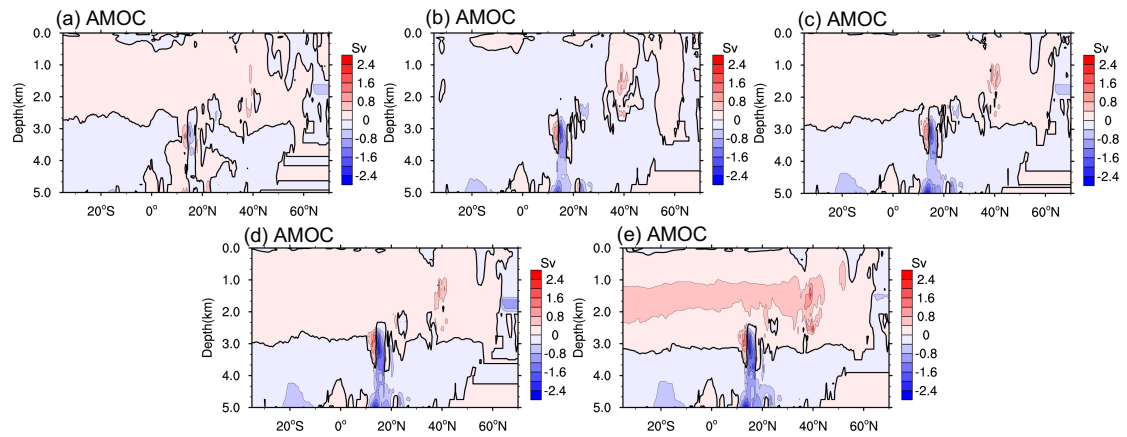

**Figure. S10.** Change in annual mean AMSF (units: Sv) averaged over (a) year 1-200, (b) year 201-400, (c) year 401-600, (d) year 601-800 and (e) year 801-1000 after adding the geothermal heat flux. Zero contour lines are indicated in black.



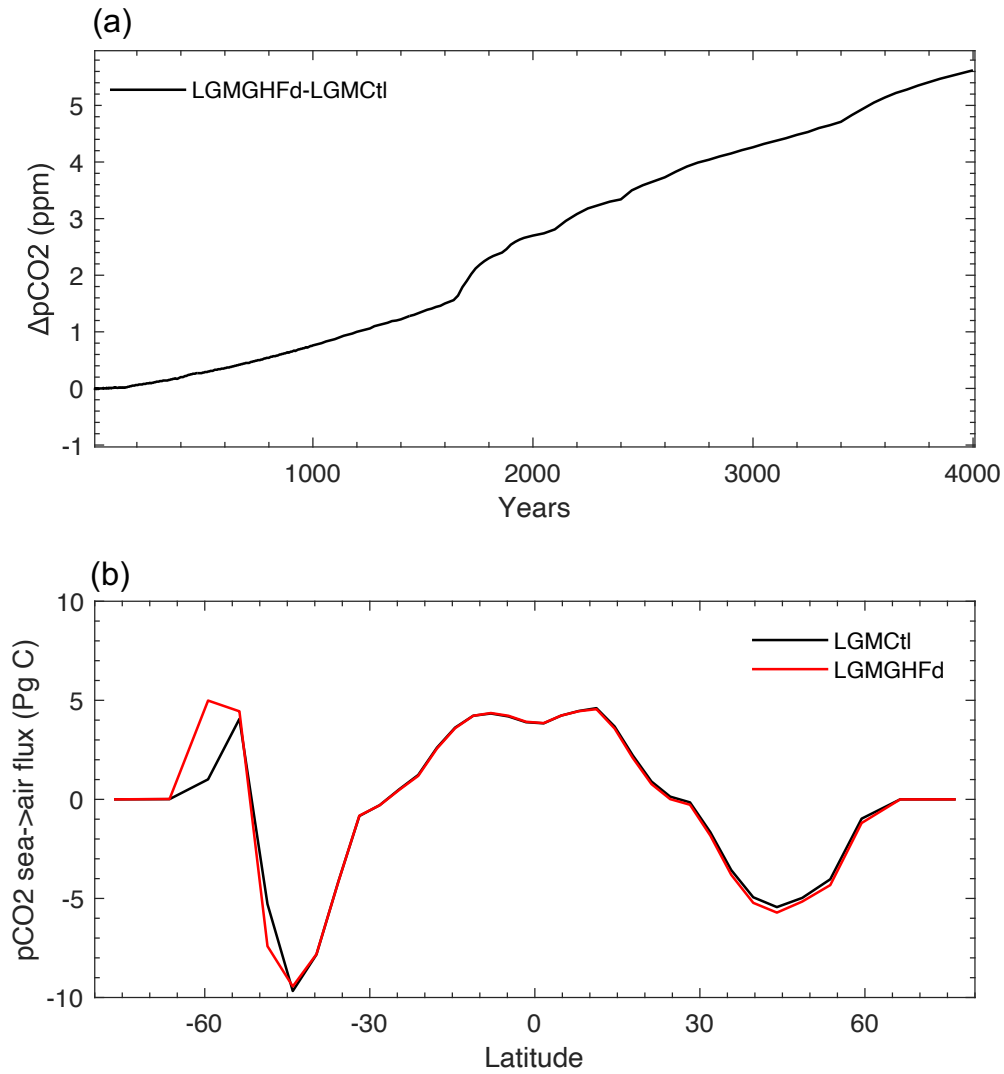

**Figure. S11.** Influence of geothermal heating on  $p\text{CO}_2$  during the LGM simulated using cGENIE. (a) evolution of  $p\text{CO}_2$  after the geothermal heating (Fig. 2a) is turned on. (b) the zonally integrated sea-to-air fluxes of  $\text{CO}_2$  when the geothermal heating is off (black curve) and on (red curve).
